# Supplementary material for: IFN-γ selectively suppresses a subset of TLR4-activated genes and enhancers to potentiate macrophage activation
Source: PubMed Central journal article supplement (PMC6658531; doi:10.1038/s41467-019-11147-3), 2019-07-25
Supplement: 41467_2019_11147_MOESM3_ESM.pdf [file 41467_2019_11147_MOESM3_ESM.pdf]

## Description of Additional Supplementary Files

File Name: Supplementary Data 1

Description: **Gene Ontology (GO) analysis of genes enriched in each cluster (Figure 1d)**. GO analysis was performed on genes in clusters I to VI using **Database for Annotation, Visualization and Integrated Discovery (DAVID)** v6.8 (<https://david.ncifcrf.gov/>) to identify enrichment of GO terms to understand the biological meaning behind the groups of genes in individual clusters. A list of enriched GO terms for each cluster shown in Figure 1d is provided. Highlighted in yellow are GO terms used in plotting the heat map ( $-\log_{10}$  p-value) in Figure 1d.
